# Supplementary material for: Facile controlled synthesis of a hierarchical porous nanocoral-like Co3S4 electrode for high-performance supercapacitors
Source: Royal Society of Chemistry journal article supplement (doi:10.1039/c6ra10427d), 2016-01-01
Supplement: c6ra10427d1.pdf [file c6ra10427d1.pdf]

## Supplementary Information

### **Facile controlled synthesis of a hierarchical porous nanocoral-like $\text{Co}_3\text{S}_4$ electrode for high-performance supercapacitors**

***Guijing Liu, Bo Wang\*, Lei Wang, Tiefeng Liu, Tiantian Gao  
and Dianlong Wang\****

*MIIT Key Laboratory of Critical Materials Technology for New Energy  
Conversion and Storage, School of Chemistry and Chemical Engineering,  
Harbin Institute of Technology, No. 92 Xidazhi Street, 150001 Harbin,  
Heilongjiang Province, China. Fax: 86 45186413721; Tel: 86 451  
86413751; E-mail: [wangdianlonghit@163.com](mailto:wangdianlonghit@163.com) (D. L. Wang),  
[wangbo19880804@163.com](mailto:wangbo19880804@163.com) (B. Wang)*

## Figures

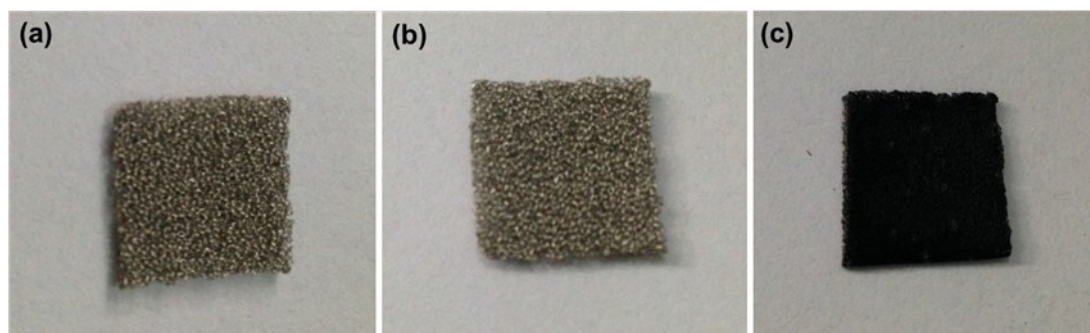

**Fig. S1†** The digital photographs of (a) bare Ni foam, (b) hydrothermal treated Ni foam and (c) Co<sub>3</sub>S<sub>4</sub> electrode grown on Ni foam.

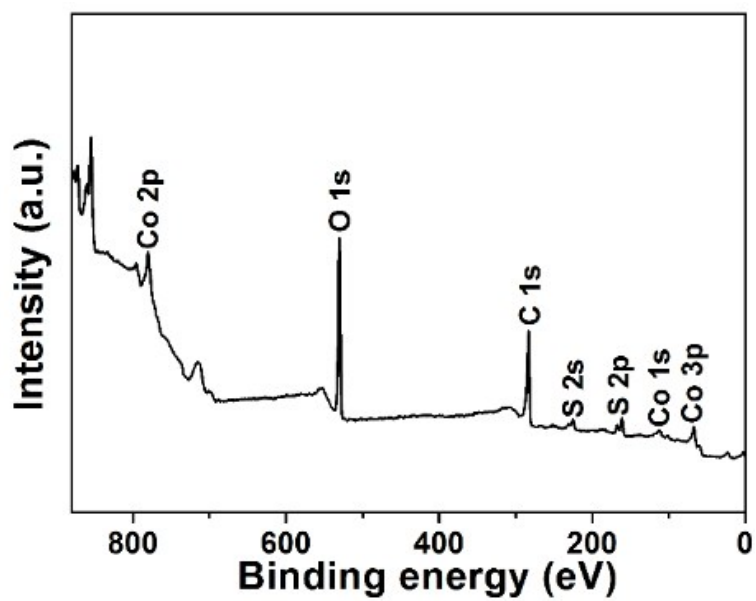

Fig. S2† The XPS survey of  $\text{Co}_3\text{S}_4$  electrode.

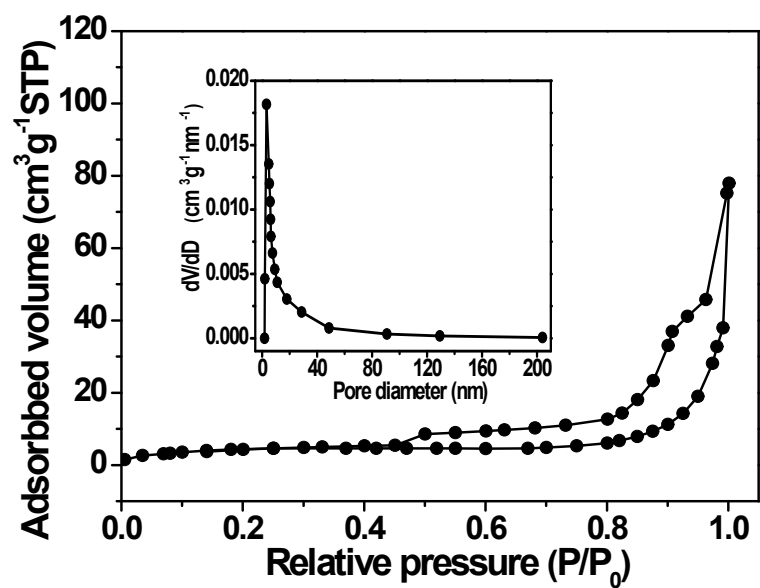

**Fig. S3†** The  $\text{N}_2$  adsorption – desorption isotherm of  $\text{Co}_3\text{S}_4$  and the inset shows the BJH pore size distribution.

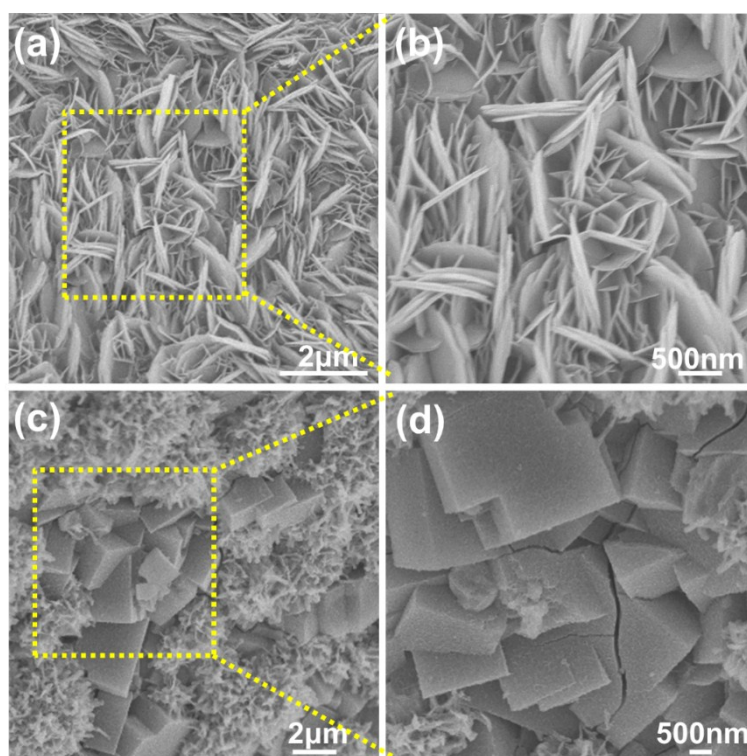

**Fig. S4†** SEM image of Co<sub>3</sub>S<sub>4</sub> electrode at 140 °C (a, b), 180 °C (c, d) at the reaction time 4 h, while keeping all other reaction parameters constant.

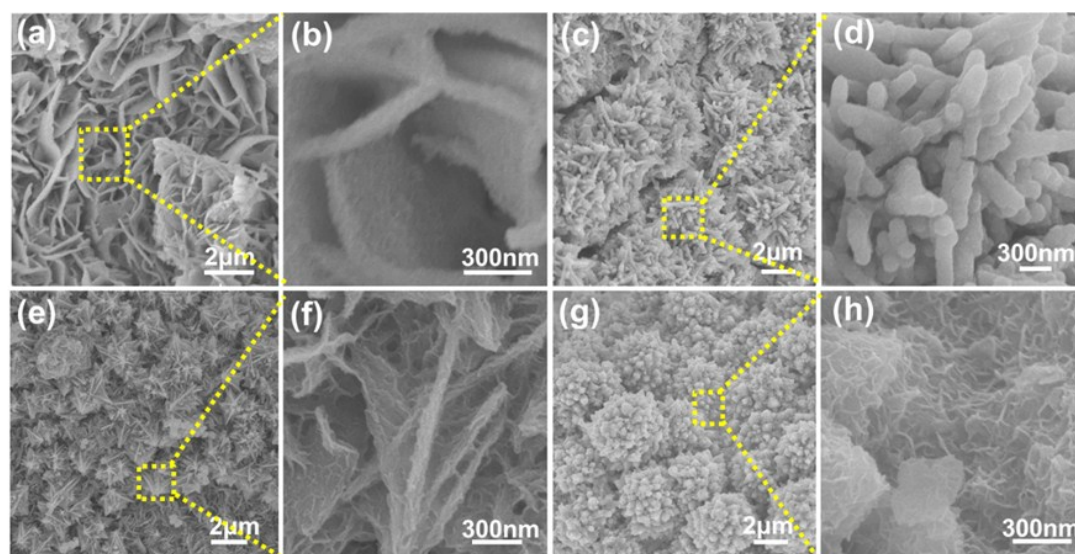

**Fig. S5†** SEM images of the samples with different ethanol/water volume ratios (R): (a, b) R = 10:30, (c, d) R = 20:20, (e, f) R = 30:10, (g, h) R = 40:0, while keeping the other reaction parameters constant.

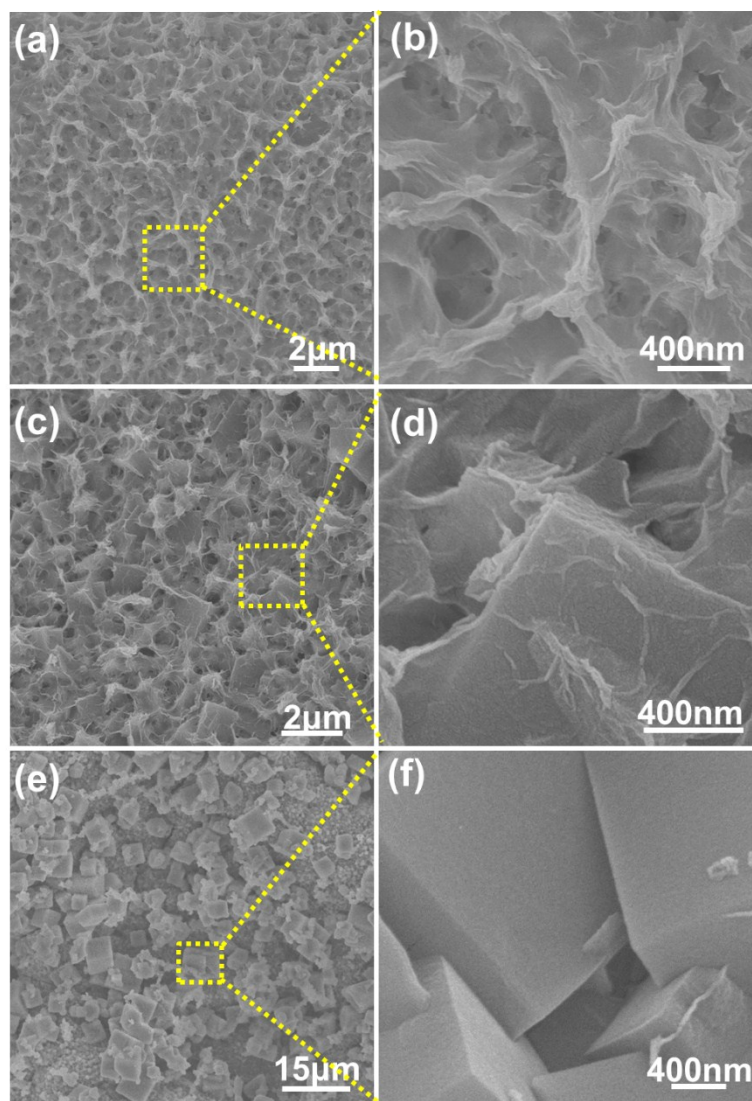

**Fig. S6†** SEM image of the samples electrode with different pH values: (a, b) pH = 7, (c, d) pH = 8, (e, f) pH = 8.5, while keeping all other reaction parameters constant.

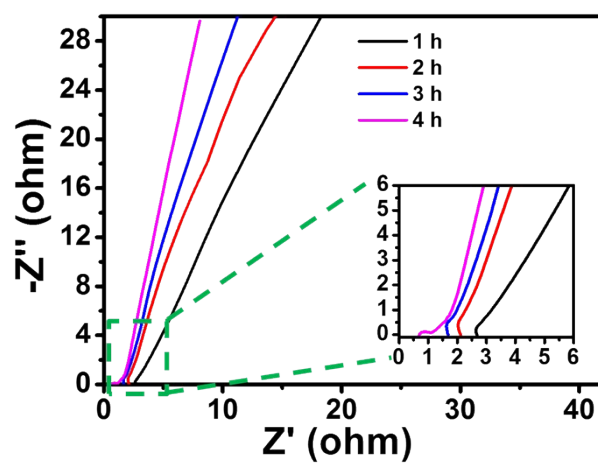

Fig. S7† Nyquist plots of  $\text{Co}_3\text{S}_4$  electrodes at 1, 2, 3 and 4 h.



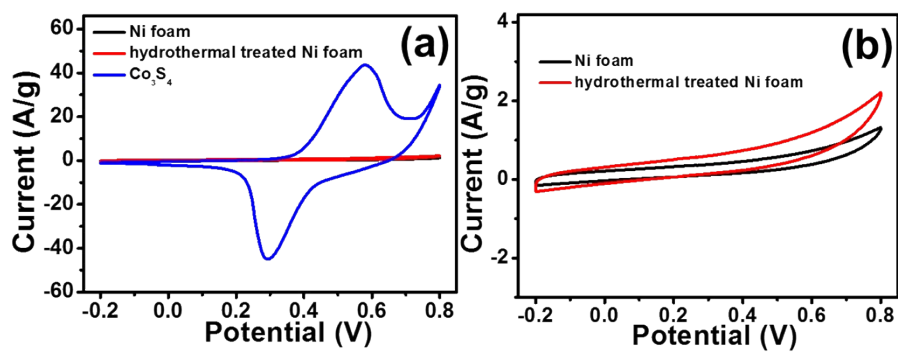

**Fig. S8†** (a) CV curves of Ni foam, hydrothermal treated Ni foam and Co<sub>3</sub>S<sub>4</sub> at a scan rate of 10 mV·s<sup>-1</sup>. (b) Enlarged CV curves of the Ni foam and hydrothermal treated Ni foam.
